# Supplementary material for: Injectable Lipid Emulsion and Clinical Outcomes in Patients Exclusively Receiving Parenteral Nutrition in an ICU: A Retrospective Cohort Study Using a Japanese Medical Claims Database
Source: MDPI journal article supplement (doi:10.3390/nu15122797), 2023-06-19
Supplement: s1 [file s1]

**Supplementary Table S1 Classification of primary diagnoses**

| <b>Diagnosis</b>                                                    | <b>International Classification of Diseases, 10th revision (ICD-10) Codes</b> |
|---------------------------------------------------------------------|-------------------------------------------------------------------------------|
| Sepsis                                                              | A02.1, A20.7, A22.7, A26.7, A32.7, A40-A41, A42.7, B37.7                      |
| Neoplasms                                                           | C00-D48, excluding D10-D36                                                    |
| Diseases of the nervous system                                      | G00-G99                                                                       |
| Ischemic heart disease                                              | I20-I25                                                                       |
| Heart failure                                                       | I50                                                                           |
| Cerebrovascular diseases                                            | I60-I69                                                                       |
| Other circulatory system diseases                                   | I00-I15, I26-I49, I51-I52, I70-I99                                            |
| Pneumonia                                                           | J10.0, J11.0, J12-J18, J85.1                                                  |
| Interstitial respiratory diseases                                   | J80-J84                                                                       |
| Other respiratory diseases                                          | J00-J09, J10.1-J10.8, J11.1-J11.8, J20-J70, J85.0, J85.2-J85.3, J86-J99       |
| Diseases of the digestive system                                    | K00-K93                                                                       |
| Kidney diseases                                                     | N00-N29                                                                       |
| Injury, poisoning and certain other consequences of external causes | S00-S99, T00-T14, T20-T65                                                     |
| Other                                                               | Other than above                                                              |

**Supplementary Table S2 Classification of surgical procedures**

| Category of Surgery      | Japan-specific Surgical Codes                                                                                     |
|--------------------------|-------------------------------------------------------------------------------------------------------------------|
| Cardiovascular           | K538-K6105, K613-K6173, K619-628, Excluding K601 and K602                                                         |
| Gastroenterological      | K5201-K5372, K630-K663, K665-K7424                                                                                |
| Cerebrovascular          | K145-K181                                                                                                         |
| Respiratory              | K488-K5181                                                                                                        |
| Orthopedic               | K023-K144                                                                                                         |
| Urological/Gynecological | K757-K8903                                                                                                        |
| Multiple surgeries       | More than one surgery in categories above                                                                         |
| Other                    | Excluding above categories, K601, and K602                                                                        |
| No surgery               | Not applicable to any of codes above, or <b>no</b> record of surgery under general or<br>lumbar spinal anesthesia |

**Supplementary Table S3 Characteristics of patients by subgroups**

| Characteristics                                 | Categories   | Patient Subgroups    |                          |                           |
|-------------------------------------------------|--------------|----------------------|--------------------------|---------------------------|
|                                                 |              | ILE-only<br>n = 1073 | ILE+ propofol<br>n = 541 | Propofol-only<br>n = 6847 |
| <b>Age, years, n (%)</b>                        | < 60         | 124 (11.6)           | 78 (14.4)                | 1511 (22.1)               |
|                                                 | 60–69        | 176 (16.4)           | 114 (21.1)               | 1473 (21.5)               |
|                                                 | 70–79        | 348 (32.4)           | 184 (34.0)               | 2144 (31.3)               |
|                                                 | 80–89        | 346 (32.2)           | 139 (25.7)               | 1545 (22.6)               |
|                                                 | ≥ 90         | 79 (7.4)             | 26 (4.8)                 | 174 (2.5)                 |
| <b>Sex, n (%)</b>                               | Male         | 702 (65.4)           | 391 (72.3)               | 4585 (67.0)               |
|                                                 | Female       | 371 (34.6)           | 150 (27.7)               | 2262 (33.0)               |
| <b>Body mass index, kg/m<sup>2</sup>, n (%)</b> | < 16         | 122 (11.4)           | 40 (7.4)                 | 277 (4.0)                 |
|                                                 | 16–18.5      | 193 (18.0)           | 83 (15.3)                | 751 (11.0)                |
|                                                 | 18.5–22.5    | 389 (36.3)           | 201 (37.2)               | 2365 (34.5)               |
|                                                 | 22.5–25      | 193 (18.0)           | 110 (20.3)               | 1592 (23.3)               |
|                                                 | ≥ 25         | 176 (16.4)           | 107 (19.8)               | 1862 (27.2)               |
| <b>Beds in admission hospital, n (%)</b>        | < 200        | 37 (3.4)             | 21 (3.9)                 | 304 (4.4)                 |
|                                                 | ≥ 200, < 500 | 677 (63.1)           | 288 (53.2)               | 3776 (55.1)               |
|                                                 | ≥ 500        | 359 (33.5)           | 232 (42.9)               | 2767 (40.4)               |
| <b>Admission year, n (%)</b>                    | 2010–2011    | 36 (3.4)             | 19 (3.5)                 | 244 (3.6)                 |
|                                                 | 2012–2013    | 119 (11.1)           | 83 (15.3)                | 648 (9.5)                 |
|                                                 | 2014–2015    | 214 (19.9)           | 104 (19.2)               | 1452 (21.2)               |
|                                                 | 2016–2017    | 277 (25.8)           | 151 (27.9)               | 2057 (30.0)               |

|                                             |                                                       |            |            |             |
|---------------------------------------------|-------------------------------------------------------|------------|------------|-------------|
|                                             | 2018–2019                                             | 363 (33.8) | 163 (30.1) | 2116 (30.9) |
|                                             | 2020                                                  | 64 (6.0)   | 21 (3.9)   | 330 (4.8)   |
| <b>Primary diagnosis<sup>1</sup>, n (%)</b> | Sepsis                                                | 64 (6.0)   | 34 (6.3)   | 472 (6.9)   |
|                                             | Neoplasm                                              | 167 (15.6) | 94 (17.4)  | 803 (11.7)  |
|                                             | Diseases of the nervous system                        | 33 (3.1)   | 12 (2.2)   | 170 (2.5)   |
|                                             | Ischemic heart disease                                | 29 (2.7)   | 20 (3.7)   | 644 (9.4)   |
|                                             | Heart failure                                         | 44 (4.1)   | 9 (1.7)    | 287 (4.2)   |
|                                             | Cerebrovascular disorders                             | 63 (5.9)   | 32 (5.9)   | 652 (9.5)   |
|                                             | Other circulatory system diseases                     | 97 (9.0)   | 78 (14.4)  | 1428 (20.9) |
|                                             | Pneumonia                                             | 64 (6.0)   | 20 (3.7)   | 173 (2.5)   |
|                                             | Interstitial respiratory diseases                     | 32 (3.0)   | 31 (5.7)   | 170 (2.5)   |
|                                             | Other respiratory diseases                            | 99 (9.2)   | 20 (3.7)   | 264 (3.9)   |
|                                             | Diseases of the digestive system                      | 249 (23.2) | 115 (21.3) | 960 (14.0)  |
|                                             | Kidney diseases                                       | 20 (1.9)   | 5 (0.9)    | 84 (1.2)    |
|                                             | Injury, poisoning, other consequences external causes | 36 (3.4)   | 18 (3.3)   | 341 (5.0)   |
|                                             | Other                                                 | 76 (7.1)   | 53 (9.8)   | 399 (5.8)   |
| <b>Charlson Comorbidity Index, n (%)</b>    | 0                                                     | 511 (47.6) | 266 (49.2) | 3521 (51.4) |
|                                             | 1-2                                                   | 397 (37.0) | 190 (35.1) | 2375 (34.7) |
|                                             | ≥ 3                                                   | 165 (15.4) | 85 (15.7)  | 951 (13.9)  |
| <b>Barthel Index, n (%)</b>                 | 100                                                   | 247 (23.0) | 151 (27.9) | 1733 (25.3) |
|                                             | 65–95                                                 | 40 (3.7)   | 35 (6.5)   | 237 (3.5)   |

|                                                  |                           |            |            |             |
|--------------------------------------------------|---------------------------|------------|------------|-------------|
|                                                  | 45–60                     | 45 (4.2)   | 15 (2.8)   | 208 (3.0)   |
|                                                  | 25–40                     | 15 (1.4)   | 14 (2.6)   | 120 (1.8)   |
|                                                  | 5–20                      | 65 (6.1)   | 36 (6.7)   | 241 (3.5)   |
|                                                  | 0                         | 512 (47.7) | 195 (36.0) | 3335 (48.7) |
|                                                  | NA                        | 149 (13.9) | 95 (17.6)  | 973 (14.2)  |
| <hr/>                                            |                           |            |            |             |
| <b>Japan Coma Scale, n (%)</b>                   | 0                         | 589 (54.9) | 325 (60.1) | 3766 (55.0) |
|                                                  | 1–3                       | 206 (19.2) | 116 (21.4) | 1096 (16.0) |
|                                                  | 10–30                     | 99 (9.2)   | 37 (6.8)   | 574 (8.4)   |
|                                                  | 100–300                   | 179 (16.7) | 63 (11.6)  | 1411 (20.6) |
|                                                  | NA                        | 0 (0.0)    | 0 (0.0)    | 0 (0.0)     |
| <hr/>                                            |                           |            |            |             |
| <b>Surgery<sup>2</sup>, n (%)</b>                | Cardiovascular            | 62 (5.8)   | 59 (10.9)  | 1092 (15.9) |
|                                                  | Gastroenterological       | 366 (34.1) | 199 (36.8) | 1544 (22.6) |
|                                                  | Cerebrovascular           | 40 (3.7)   | 21 (3.9)   | 376 (5.5)   |
|                                                  | Respiratory               | 6 (0.6)    | 3 (0.6)    | 32 (0.5)    |
|                                                  | Orthopedic                | 4 (0.4)    | 3 (0.6)    | 33 (0.5)    |
|                                                  | Urological/Gynecological  | 7 (0.7)    | 3 (0.6)    | 31 (0.5)    |
|                                                  | Multiple surgeries        | 6 (0.6)    | 5 (0.9)    | 51 (0.7)    |
|                                                  | Other                     | 28 (2.6)   | 19 (3.5)   | 147 (2.1)   |
|                                                  | No surgery                | 554 (51.6) | 229 (42.3) | 3541 (51.7) |
| <hr/>                                            |                           |            |            |             |
| <b>Prescription/treatment<sup>3</sup>, n (%)</b> | Catecholamines            | 744 (69.3) | 430 (79.5) | 5345 (78.1) |
|                                                  | Transfusion               | 562 (52.4) | 331 (61.2) | 4236 (61.9) |
|                                                  | Albumin                   | 596 (55.5) | 361 (66.7) | 4075 (59.5) |
|                                                  | Renal replacement therapy | 210 (19.6) | 136 (25.1) | 1879 (27.4) |

|                                                                           |                             |                   |                   |                   |
|---------------------------------------------------------------------------|-----------------------------|-------------------|-------------------|-------------------|
|                                                                           | Intra-aortic balloon pump   | 35 (3.3)          | 26 (4.8)          | 859 (12.5)        |
|                                                                           | Plasmapheresis              | 1 (0.1)           | 4 (0.7)           | 39 (0.6)          |
|                                                                           | ECMO                        | 12 (1.1)          | 19 (3.5)          | 500 (7.3)         |
|                                                                           | Nutritional support team    | 56 (5.2)          | 32 (5.9)          | 85 (1.2)          |
|                                                                           | Rehabilitation <sup>4</sup> | 620 (57.8)        | 278 (51.4)        | 2940 (42.9)       |
| <b>Parenteral nutrition<sup>5</sup>, median (Q1, Q3)</b>                  | Energy, <i>kcal/kg</i>      | 14.1 (10.3, 19.1) | 15.8 (11.7, 20.4) | 9.8 (6.2, 14.5)   |
|                                                                           | Amino Acid, <i>g/kg</i>     | 0.41 (0.23, 0.59) | 0.42 (0.25, 0.61) | 0.19 (0.00, 0.38) |
|                                                                           | Lipid, <i>g/kg</i>          | 0.19 (0.11, 0.29) | 0.28 (0.19, 0.41) | 0.12 (0.06, 0.20) |
|                                                                           | Carbohydrate, <i>g/kg</i>   | 2.7 (1.8, 3.7)    | 2.9 (2.0, 3.7)    | 1.9 (1.1, 2.9)    |
| <b>Days without nutrition from day 8<sup>6</sup>,<br/>median (Q1, Q3)</b> |                             | 0.0 (0.0, 0.0)    | 0.0 (0.0, 1.0)    | 0.0 (0.0, 0.0)    |

**Abbreviations:** ECMO, extracorporeal membrane oxygenation; Q1, first quartile; Q3, third quartile.

<sup>1</sup> Diagnoses identified using International Statistical Classification of Diseases and Related Health Problems, 10th revision.

<sup>2</sup> Between day of hospital admission and day of intensive care unit admission, based on Japan-specific codes.

<sup>3</sup> During days 1 to 7 of intensive care unit admission. Day 1 regarded as day of intensive care unit admission.

<sup>4</sup> Feeding therapy and/or rehabilitation for cardiac microvascular, cerebrovascular, disuse syndrome, locomotor, and/or respiratory diseases.

<sup>5</sup> Medians of mean prescribed daily doses during days 1 to 7 of intensive care unit admission.

<sup>6</sup> Days without nutrition (oral intake, enteral nutrition, or parenteral amino acids/lipid) from day 8 to day of discharge or in-hospital death.
